# Supplementary material for: Development of UV Spectrophotometric Procedures for Determination of Amlodipine and Celecoxib in Formulation: Use of Scaling Factor to Improve the Sensitivity
Source: Hindawi journal article supplement (doi:10.1155/2019/8202160), 2019-12-07
Supplement: f1 [file 8202160.f1.zip]

Archive with 5 entries (5 files):
- 8202160.f1/File 1.docx
- 8202160.f1/File 2.docx
- 8202160.f1/File 3.docx
- 8202160.f1/File 4.docx
- 8202160.f1/File 5.docx
