# Supplementary material for: Development of UV Spectrophotometric Procedures for Determination of Amlodipine and Celecoxib in Formulation: Use of Scaling Factor to Improve the Sensitivity
Source: Hindawi journal article supplement (doi:10.1155/2019/8202160), 2019-12-07
Supplement: f1 [file 8202160.f1.zip › 8202160.f1/File 2.docx]

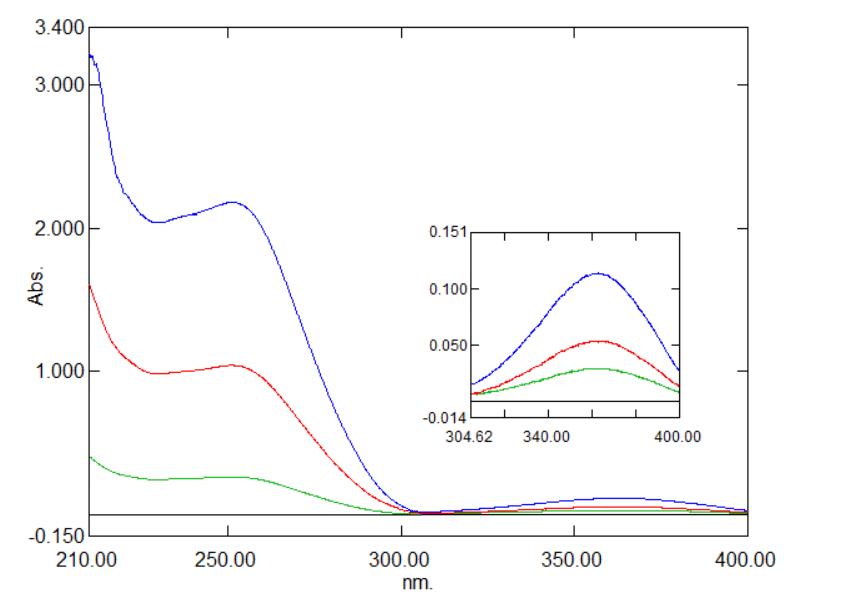


Fig S2 A. Normal spectra of AMD and COX in a ratio 1:5, 4:20 and 8:40 µg/ml for precision and accuracy. Enlarged part for AMD (1, 4, 8 µg/ml) for measuring absorption at 363.4


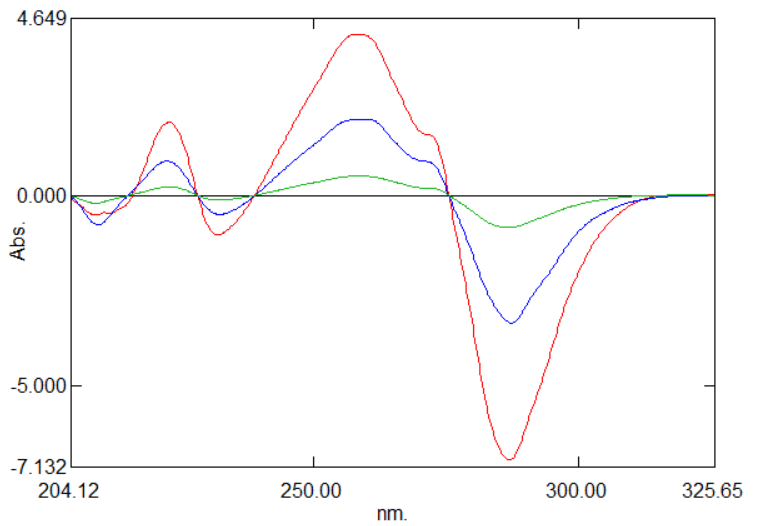


Fig S2 B. First derivative of ratio spectra of C5, 20 and 40 µg/ml for precision and accuracy
