# Supplementary material for: Development of UV Spectrophotometric Procedures for Determination of Amlodipine and Celecoxib in Formulation: Use of Scaling Factor to Improve the Sensitivity
Source: Hindawi journal article supplement (doi:10.1155/2019/8202160), 2019-12-07
Supplement: f1 [file 8202160.f1.zip › 8202160.f1/File 3.docx]

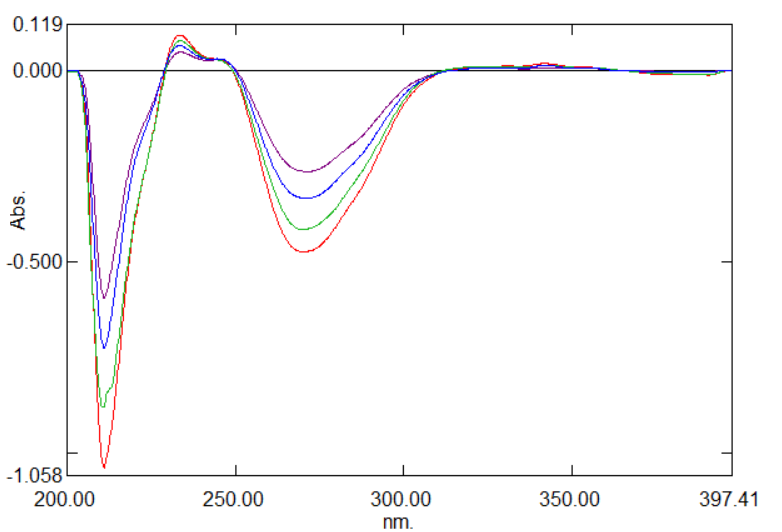


Figure S3 First derivative of Mixture of AMD and COX in a ratio 1:20 (Formulation), 2:25, 3:30 and 4:35 µg/ml respectively for formulation and recovery studies.
