# Supplementary material for: Development of UV Spectrophotometric Procedures for Determination of Amlodipine and Celecoxib in Formulation: Use of Scaling Factor to Improve the Sensitivity
Source: Hindawi journal article supplement (doi:10.1155/2019/8202160), 2019-12-07
Supplement: f1 [file 8202160.f1.zip › 8202160.f1/File 4.docx]

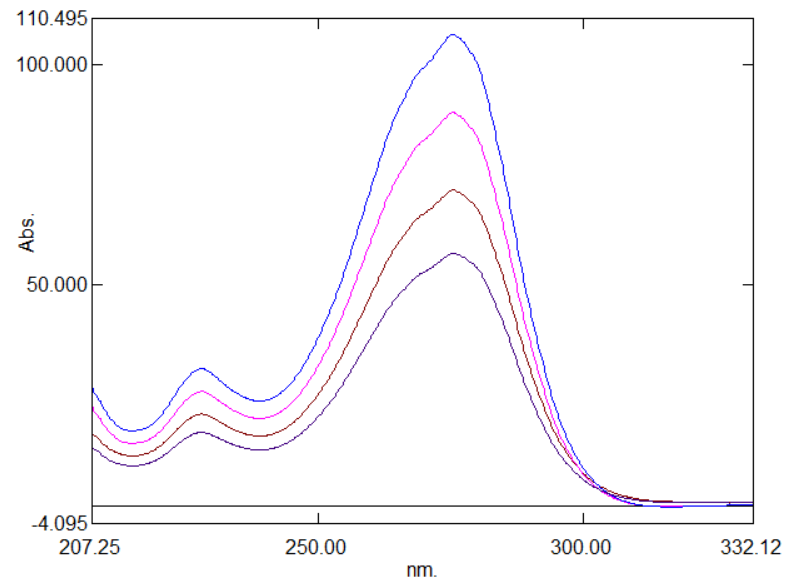


Fig S4 A : Ratio spectra of COX 20, 25, 30, 35 µg/ml using AMD (2 µg/ml ) solution spectrum as devisor


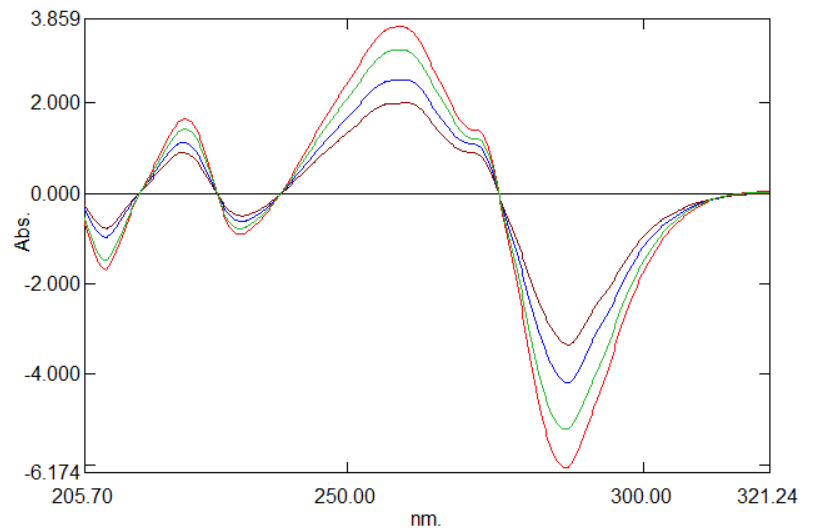


Figure S4 :B. First derivative of ratio spectra of COX 20, 25, 30 and 35 µg/ml using 4 nm as ∆λ
