# Supplementary material for: Development of UV Spectrophotometric Procedures for Determination of Amlodipine and Celecoxib in Formulation: Use of Scaling Factor to Improve the Sensitivity
Source: Hindawi journal article supplement (doi:10.1155/2019/8202160), 2019-12-07
Supplement: f1 [file 8202160.f1.zip › 8202160.f1/File 5.docx]

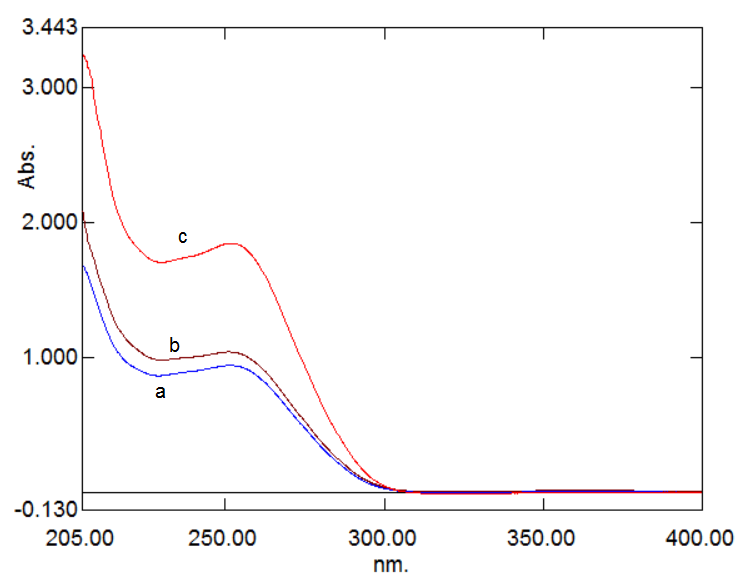


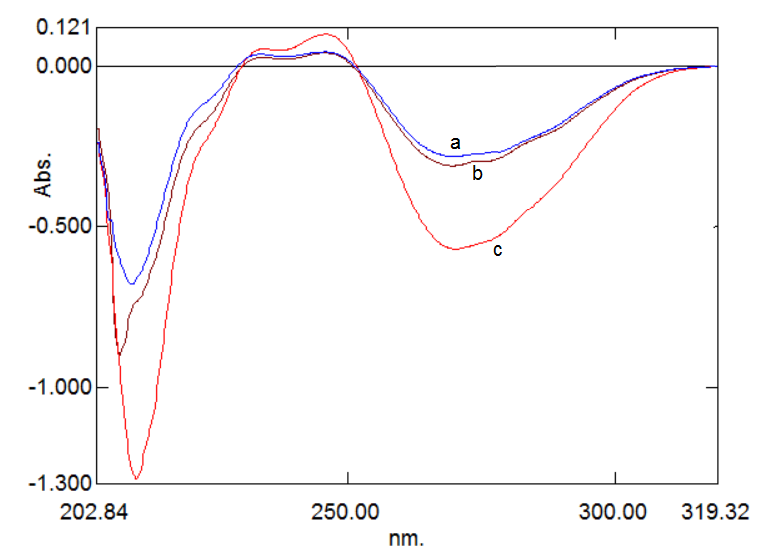
Fig S5 A: Normal spectra of AMD and COX in a ratio (a) 0.5:20, (b) 1:20 and (c) 0.5:40 µg/ml from tablet

Fig S5 B: First derivative spectra of AMD and COX in a ratio (a)0.5:20, (b)1:20 and (c)0.5:40 µg/ml from tablet


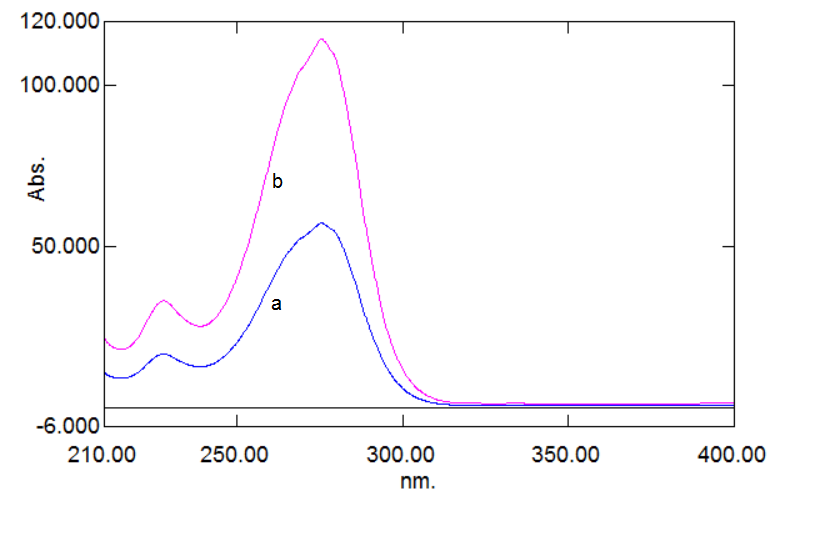


Fig S5 C: Ratio spectra of tablet solution of (a) COX 20 µg/ml and (b) COX 40 µg/ml using AMD (2 µg/ml ) solution spectrum as devisor


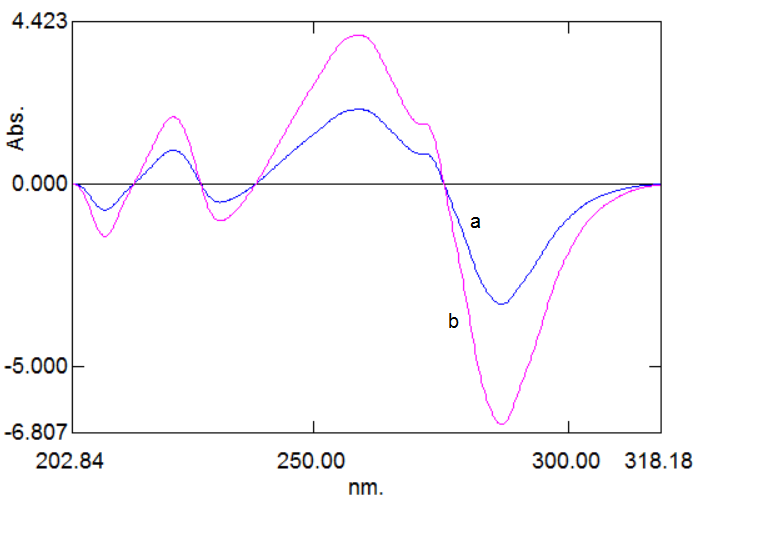


Fig S5 D: First derivative of ratio spectra of tablet solution of (a) COX 20 µg/ml, and (b) COX 40 µg/ml using 4 nm as ∆λ
