# Supplementary figures and images for: Development of UV Spectrophotometric Procedures for Determination of Amlodipine and Celecoxib in Formulation: Use of Scaling Factor to Improve the Sensitivity
Source: Hindawi journal article supplement (doi:10.1155/2019/8202160), 2019-12-07

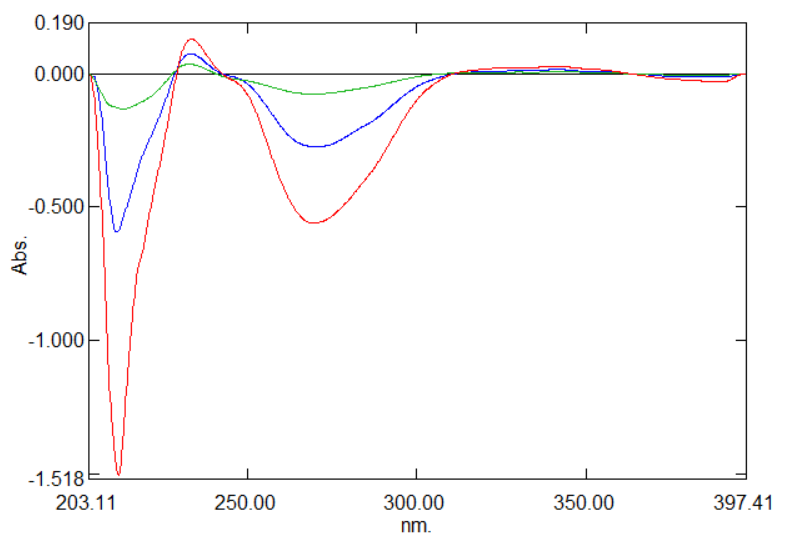


Fig S1. First derivative spectra of AMD and COX in a ratio 1:5, 4:20 and 8:40 for precision and accuracy

Supplement: f1 [file 8202160.f1.zip › 8202160.f1/File 1.docx]
